# Supplementary material
Source: publisher figshare collection journal article supplement (https://tandf.figshare.com/articles/dataset/_/5630149)
Supplement: Supplementary file 1 [file 1]

**Supplementary Table 1** showing that for all combinations of estrogenreceptor (ER) status and HER2 status, samples with high as well as low values of tumour-infiltrating lymphocytes (TILs) were found, though ER+/HER2- were found to have a lower mean TILs value than the other subgroups

| Tumour-infiltrating lymphocytes (TILs) in breast cancer subgroups |          |          |                           |                      |
|-------------------------------------------------------------------|----------|----------|---------------------------|----------------------|
|                                                                   | <b>N</b> | <b>%</b> | <b>Mean TILs (95% CI)</b> | <b>Range of TILs</b> |
| <b>ER+/HER2-</b>                                                  | 81       | 69       | 0.13 (0.10-0.16)          | 0.03-0.82            |
| <b>ER+/HER2+</b>                                                  | 24       | 20       | 0.23 (0.15-0.31)          | 0.04-0.78            |
| <b>ER-/HER2+</b>                                                  | 11       | 9        | 0.27 (0.18-0.36)          | 0.05-0.52            |
| <b>ER-/HER2-</b>                                                  | 2        | 2        | 0.45 (n.e.)               | 0.08-0.83            |
