# Supplementary material
Source: publisher figshare collection journal article supplement (https://tandf.figshare.com/articles/dataset/_/5630149)

**Supplementary Figure 1** shows the mean value and standard deviation (SD) of stromal tumour infiltrating lymphocytes (TILs) level for each of the nine participating pathologists, ranked according to increasing mean value. The figure shows that observers seemed to have individual thresholds or scaling, and the mean TILs values for each observer ranged from 10-23%

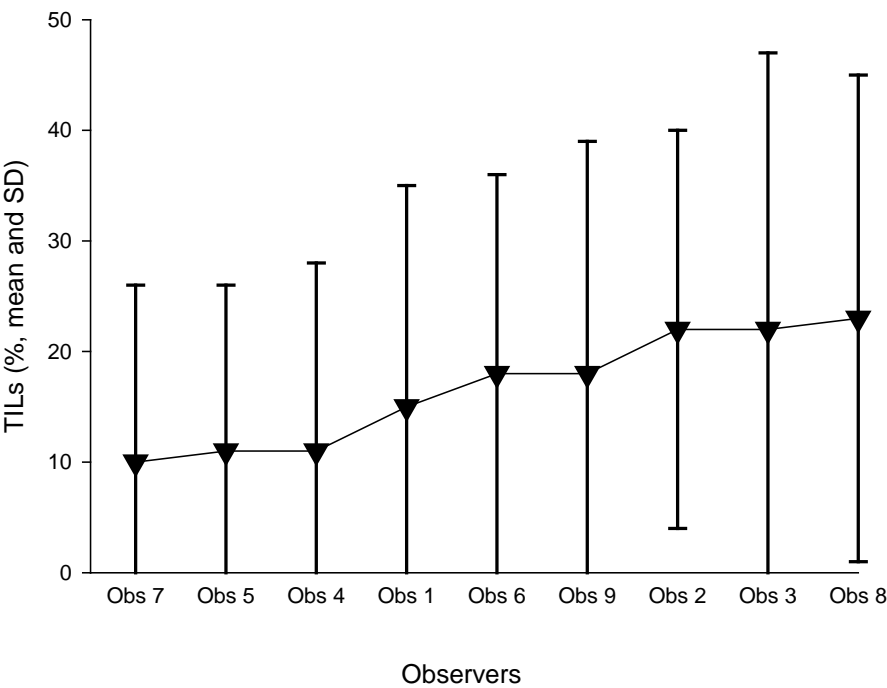

Supplement: Supplementary file 2 [file 1]
